## FEEDS

## Comparison of the TRAACS 800 with AOAC Methods for Calcium and Phosphorus in Feeds

ANNE ORCUTT, PETER KANE, and SANDRA IMBODEN

*Purdue University, Department of Biochemistry, West Lafayette, IN 47907*

**Existing automated methods for calcium and phosphorus in animal feeds have been upgraded to permit determination of protein, calcium, and phosphorus simultaneously from a single sample solution running on a new generation of automated instruments. Minor changes and improvements in chemistry are described, and results using the new method are compared to results using AOAC official atomic absorption (calcium) and gravimetric (phosphorus) methods. For calcium, *t*-tests showed no significant difference at the  $P \leq 0.01$  level over a range of concentration levels from 0–25%. For phosphorus, *t*-tests showed no significant difference at the  $P \leq 0.01$  level over concentration ranges of 0–2% and 2–6%. Significant differences did exist at a concentration range of 6–18%. The small existing bias in these ranges was shown to be due to irregularities in the phosphorus standard curve fit, caused by protein and/or calcium components in the combined standard solutions.**

Currently, AOAC official methods for determining calcium (968.08) and phosphorus (962.02, 968.08) in animal feeds are manual methods using atomic absorption and gravimetric techniques, respectively (1). In 1976, Hambleton (2) developed automated simultaneous methods for protein, calcium, and phosphorus, using the protein digest from a block digester. The analysis used a second-generation autoanalyzer, the Technicon AAI. Recently, Bran + Luebbe (Technicon) Analyzing Technologies, Inc. released the TRAACS 800, a third-generation autoanalyzer. The numerous advantages of TRAACS 800 technology over AAI technology have been discussed previously (3). As with the AAI system, TRAACS methods for calcium and phosphorus can be used individually or as part of a simultaneous system to determine protein, calcium, and phosphorus. The TRAACS protein method has been previously collaborated (4), and is contained in AOAC method 990.02. The simultaneous, 3 channel system was used for the present study of the equivalency of calcium and phosphorus analyses on the TRAACS 800 with AOAC official methods.

**Manifold Improvements**

TRAACS calcium chemistry has remained quite similar to the older AAI chemistry with only 2 noteworthy reagent changes. Triton X-100 and sodium acetate replaced Brij-35 and phosphate buffer, respectively.

TRAACS phosphorus chemistry has been altered to include the following improvements. Molybdate, vanadate, and wetting agent are contained in 3 separate reagents. Each is introduced independently into the flow stream and mixed on line. This affords a much greater degree of reagent stability as compared to the single reagent used on the AAI manifold. Wetting agent A has been replaced with Steol, a new phos-

phorus-compatible wetting agent. Water has been replaced with dilute sulfuric acid as the sample diluent, and the method of dilution has been changed from a resample loop in the AAI system to a dialysis membrane in the TRAACS system. The dilution loop was the least reliable part of the AAI manifold. Not only does the membrane serve as a diluter, it may also filter some components of the donor stream.

Note that the sample wash solution is 6%  $H_2SO_4$  instead of water as indicated in the Bran + Luebbe supplied methods.

**TRAACS Method Refinements**

Initially, the system was configured as in the protein collaborative study (4). Additional precision was gained in the phosphorus and calcium channels by reducing the sampling rate from 120 to 90 samples/h. However, under these conditions, standards analyzed as samples consistently produced phosphorus and calcium results moderately below their theoretical concentrations (Table 1).

The low standard response problem was first addressed on the phosphorus channel. Acid effects and order-of-analysis effects were examined. An acid effect was noted whereby increasing acid concentration decreased phosphorus instrument response (Table 2). One varying source of acid in the combined standard solutions is the different aliquots of the calcium standard stock solution due to the HCl used in dissolving the  $CaCO_3$ . To minimize this effect, the amount of HCl in the calcium stock solution was reduced from 12.5 to 2.5 mL HCl/250 mL stock solution, because 2.5 mL HCl is the minimum amount of acid required to dissolve the  $CaCO_3$  standard material. Minimizing the amount of acid (and thus the variation in concentration) improved, but did not completely correct, the low bias of standards analyzed as samples (Table 3).

As an additional test, 60 routine feed samples were ana-

**Table 1. Standards analyzed as samples (mg/L) using protocol designated in protein collaborative study (4)**

| Standard number | Theoretical concn | Experimental concn <sup>a</sup> |
|-----------------|-------------------|---------------------------------|
| Calcium         |                   |                                 |
| 1               | 20                | 18.94                           |
| 2               | 40                | 40.20                           |
| 3               | 80                | 78.93                           |
| 4               | 150               | 149.53                          |
| 5               | 200               | 199.79                          |
| 6               | 250               | 249.90                          |
| Phosphorus      |                   |                                 |
| 1               | 10                | 9.39                            |
| 2               | 20                | 19.09                           |
| 3               | 40                | 39.49                           |
| 4               | 48                | 47.53                           |
| 5               | 64                | 63.62                           |
| 6               | 80                | 79.59                           |

<sup>a</sup> Mean value,  $n = 10$ .

Received October 15, 1990. Accepted January 30, 1991.

Published as Journal Paper, No. 12591 of the Purdue University Agricultural Experiment Station.

**Table 2. Effect of acid on phosphorus response in solutions of constant phosphorus concentration**

| Solution number | H <sub>2</sub> SO <sub>4</sub> , mL/250 mL | Phosphorus, <sup>a</sup> mg/L |
|-----------------|--------------------------------------------|-------------------------------|
| 1               | 0                                          | 70.08                         |
| 2               | 5                                          | 69.56                         |
| 3               | 10                                         | 68.67                         |
| 4               | 15                                         | 67.70                         |

<sup>a</sup> Mean value,  $n = 4$ .

lyzed by the official gravimetric method and by the TRAACS method using both sets of standards (2.5 mL and 12.5 mL HCl in the calcium stock standard solution). For lower level (0–6%) phosphorus samples, results from the 2.5 mL HCl standards were in better agreement with gravimetric results than were results from the original standards (Table 4).

The run protocol, or order of analysis, was examined next. It was postulated that the series of null high standard peaks sampled before both the first calibrant and the gain peak could be artificially elevating the standard curve due to uncorrected carryover. An elevation of the standard curve would cause the sample results to be low. Zero concentration standard solution was substituted for the high standard solution in the null peaks preceding both the calibrant sequence and the gain peak. Phosphorus standards (made with 2.5 mL HCl) analyzed with this revised protocol displayed some improvement in agreement (Table 5).

Using the same standards and run protocol, 60 real samples were analyzed by the TRAACS method and the official gravimetric method (Table 6). Average differences were 0.007% for samples in the range 0–2% phosphorus, 0.047% for 2–6% phosphorus, 0.202% for 6–18% phosphorus, and 0.067% overall. While these differences are relatively small,  $t$ -tests showed a significant difference for samples >6% phosphorus.

Additional experimental work examining standard curve fitting led to the conclusion that irregularities in the lower end of the standard curve were probably the source of the slight bias in phosphorus results. When standards containing only phosphorus were examined, the phosphorus curve fit was improved, and the standards analyzed against them-

**Table 3. Phosphorus standards analyzed as samples (mg/L) with 12.5 and 2.5 mL HCl in calcium stock standard**

| Standard number | Theoretical concn | Experimental concn <sup>a</sup> |
|-----------------|-------------------|---------------------------------|
| 12.5 mL HCl     |                   |                                 |
| 1               | 10                | 9.39                            |
| 2               | 20                | 19.09                           |
| 3               | 40                | 39.49                           |
| 4               | 48                | 47.53                           |
| 5               | 64                | 63.62                           |
| 6               | 80                | 79.59                           |
| 2.5 mL HCl      |                   |                                 |
| 1               | 0                 | 0.14                            |
| 2               | 15                | 13.97                           |
| 3               | 30                | 29.13                           |
| 4               | 45                | 44.92                           |
| 5               | 60                | 60.39                           |
| 6               | 80                | 79.65                           |

<sup>a</sup> Mean value,  $n = 6$ .**Table 4. Routine feed samples ( $n = 60$ ) analyzed by official gravimetric (962.02 C (b)) method and TRAACS method, using 2.5 and 12.5 mL HCl in calcium stock standard**

| Phosphorus, % | % Mean difference (962.02 – TRAACS) | Significance ( $P = 0.05$ ) |
|---------------|-------------------------------------|-----------------------------|
| 2.5 mL HCl    |                                     |                             |
| 0–2           | –0.004                              | No                          |
| 2–6           | –0.047                              | No                          |
| 6–18          | –0.202                              | Yes                         |
| 12.5 mL HCl   |                                     |                             |
| 0–2           | –0.025                              | Yes                         |
| 2–6           | –0.048                              | Yes                         |
| 6–18          | –0.153                              | Yes                         |

selves indicated that the bias would be corrected in both the right direction and magnitude. However, it was decided that a 3-component standard system was the practical alternative, so further attempts at completely eliminating the remaining phosphorus bias were not pursued.

On the calcium channel, reducing the acid concentration in the calcium stock standard solution greatly reduced the low bias of standards analyzed as samples (Table 7). Moreover, the combination of the revised protocol and 2.5 mL acid in the calcium stock standard eliminated the bias (Table 8). Under these conditions, there was no difference between the TRAACS method and the official atomic absorption method over a wide range of routine feed samples (Table 9).

It should be noted that the change of phosphorus and calcium null concentrations from high to low standards, if also applied to the protein channel, would technically be a change from what was specified in the protocol used in the TRAACS protein collaborative study. Several experiments were designed to test for any adverse effect on the protein channel.

Standards were analyzed as samples in random order on the protein channel in runs where high as compared to low standards were used for null peaks, at both 90 and 120 samples/h. Means of 4 values for each standard produced as good or better agreement with theoretical values with the low null protocol at each sampling rate.

A group of 39 routine samples were also analyzed using the high vs low null concentrations, again at both 90 and 120 samples/h.  $t$ -Tests were used to check for any significant difference in results. At 120 samples/h, the mean difference (high minus low null protocols) was 0.05% protein. The  $t$  value was 0.728, not significantly different at the 95% confidence level. At 90 samples/h the mean difference (high minus low null protocols) was 0.07% protein. The  $t$  value was 2.143, just significant at the 95% confidence level. However,

**Table 5. Phosphorus standards as samples (mg/L) using revised protocol of low nulls**

| Standard number | Theoretical concn | Experimental concn <sup>a</sup> |
|-----------------|-------------------|---------------------------------|
| 1               | 0                 | 0.22                            |
| 2               | 15                | 14.77                           |
| 3               | 30                | 29.79                           |
| 4               | 45                | 44.83                           |
| 5               | 60                | 60.19                           |
| 6               | 80                | 80.26                           |

<sup>a</sup> Mean value,  $n = 6$ .

**Table 6. Determination of phosphorus in routine feed samples by official gravimetric method and TRAACS method, using 2.5 mL HCl in calcium stock standard and revised protocol of low nulls<sup>a</sup>**

| Gravimetric <sup>b</sup> | TRAACS <sup>b</sup> | Diff. <sup>b</sup> |
|--------------------------|---------------------|--------------------|
| 0.604                    | 0.601               | 0.003              |
| 0.712                    | 0.699               | 0.013              |
| 0.756                    | 0.750               | 0.006              |
| 0.853                    | 0.879               | -0.026             |
| 0.862                    | 0.847               | 0.015              |
| 0.866                    | 0.849               | 0.017              |
| 0.870                    | 0.862               | 0.008              |
| 0.929                    | 0.954               | -0.025             |
| 1.007                    | 1.026               | -0.019             |
| 1.012                    | 0.996               | 0.016              |
| 1.101                    | 1.080               | 0.021              |
| 1.172                    | 1.167               | 0.005              |
| 1.223                    | 1.206               | 0.017              |
| 1.248                    | 1.246               | 0.002              |
| 1.310                    | 1.288               | 0.022              |
| 1.337                    | 1.352               | -0.015             |
| 1.389                    | 1.383               | 0.006              |
| 1.454                    | 1.538               | -0.084             |
| 1.471                    | 1.454               | 0.017              |
| 1.626                    | 1.726               | -0.100             |
| 1.660                    | 1.727               | -0.067             |
| 1.711                    | 1.679               | 0.032              |
| 1.826                    | 1.819               | 0.007              |
| 1.884                    | 1.871               | 0.013              |
| 1.885                    | 1.884               | 0.001              |
| 1.986                    | 1.982               | 0.004              |
| 2.037                    | 2.156               | -0.119             |
| 2.103                    | 2.065               | 0.038              |
| 2.280                    | 2.237               | 0.043              |
| 2.495                    | 2.442               | 0.053              |
| 3.443                    | 3.406               | 0.037              |
| 3.564                    | 3.444               | 0.120              |
| 3.852                    | 3.951               | -0.099             |
| 3.873                    | 3.926               | -0.053             |
| 3.939                    | 3.903               | 0.036              |
| 4.368                    | 4.570               | -0.202             |
| 4.558                    | 4.763               | -0.205             |
| 4.654                    | 4.549               | 0.105              |
| 4.671                    | 4.889               | -0.218             |
| 4.995                    | 4.929               | 0.066              |
| 5.172                    | 5.212               | -0.040             |
| 5.195                    | 5.142               | 0.053              |
| 5.670                    | 5.950               | -0.280             |
| 5.724                    | 5.916               | -0.192             |
| 5.912                    | 5.941               | -0.029             |
| 6.356                    | 6.342               | 0.014              |
| 6.537                    | 6.422               | 0.115              |
| 7.526                    | 7.460               | 0.066              |
| 8.385                    | 8.189               | 0.196              |
| 8.616                    | 8.756               | -0.140             |
| 9.210                    | 9.189               | 0.021              |
| 9.370                    | 9.567               | -0.197             |
| 9.612                    | 10.147              | -0.535             |
| 10.582                   | 10.806              | -0.224             |
| 10.823                   | 10.973              | -0.150             |
| 11.690                   | 12.011              | -0.321             |
| 12.075                   | 12.949              | -0.874             |
| 12.142                   | 12.503              | -0.361             |
| 16.675                   | 17.245              | -0.570             |
| 17.815                   | 17.886              | -0.071             |

<sup>a</sup> *t*-Tests grouped by concn ranges at the  $P \leq 0.01$  level. 0–2% ( $n = 26$ ), no significant difference; 2–6% ( $n = 19$ ), no significant difference; 6–19% ( $n = 15$ ), significantly different; 0–18% ( $n = 60$ ), significantly different.

<sup>b</sup> Percent phosphorus.

**Table 7. Calcium standards as samples (mg/L) with 2.5 mL HCl in calcium stock standard**

| Standard number | Theoretical concn | Experimental concn <sup>a</sup> |
|-----------------|-------------------|---------------------------------|
| 1               | 0                 | 0.16                            |
| 2               | 50                | 49.29                           |
| 3               | 100               | 99.68                           |
| 4               | 150               | 149.90                          |
| 5               | 200               | 199.84                          |
| 6               | 250               | 248.34                          |

<sup>a</sup> Mean value,  $n = 6$ .

because the standard deviation of the differences was only half that of the standard deviation of the differences at the 120 samples/h rate, it was judged that there was no practical difference in protein results. The change of null concentration does not introduce a change in protein results as compared to results from the configuration used in the protein collaborative study.

### Conclusions

Phosphorus methodology on the TRAACS instrument is in good agreement with the official gravimetric method up to a level of 6% phosphorus. At levels above 6%, there is a slight high bias on the TRAACS. The bias is attributed to imperfect phosphorus curve fitting due to matrix interference in the 3-component mixed standard. TRAACS calcium methodology shows no statistical difference with the official atomic absorption method. Slight changes in sample run order on the TRAACS, which improve calcium and phosphorus results, are shown not to alter official TRAACS protein results.

### METHOD FOR CALCIUM IN FEEDS

#### Principle

Samples are digested with  $H_2SO_4$  in a block digester and reacted with cresolphthalein in an alkaline medium (pH 10.6). Absorbance of calcium-cresolphthalein complex is measured in a flow cell at 570 nm. Magnesium interference is eliminated by adding 8-hydroxyquinoline.

#### Apparatus

(a) *Block digester*.—Capable of maintaining a constant temperature of 410°C.

(b) *Continuous flow autoanalyzer*.—[Bran + Luebbe (Technicon) Analyzing Technologies, Inc. TRAACS 800] with calcium manifold 165-D010-01 (Figure 1).

#### Reagents

(a) *Wetting agent*.—Add 50 mL methanol to 50 mL Triton X-100<sup>R</sup> (Sigma Chem. Co., PO Box 14508, St. Louis, MO 63178), mix.

(b) *System wash solution*.—Add 1 mL wetting agent (a) to 1 L  $H_2O$ , mix.

(c) *0.3M Sodium acetate solution*.—Dissolve 40.8 g sodium acetate in ca 800 mL  $H_2O$ . Dilute to 1 L, mix, add 1 mL wetting agent (a), mix.

(d) *Sampler wash solution 6%  $H_2SO_4$* .—Dissolve 60 mL  $H_2SO_4$  in 800 mL  $H_2O$ , cool, dilute to 1 L, mix.

(e) *2N HCl solution*.—Add 165 mL HCl to ca 700 mL  $H_2O$ , mix, cool, dilute to 1 L, mix.

(f) *CPC solution*.—Pipet 20 mL 2N HCl (e) to 1 L volumetric flask. Add ca 100 mL  $H_2O$ . Add 2 g 8-hydroxyquinoline, swirl to dissolve. Add 50 mg accurately weighed *O*-

**Table 8. Calcium standards as samples (mg/L) with 2.5 mL HCl in calcium stock standard solution using revised protocol of low nulls**

| Standard number | Theoretical concn | Experimental concn <sup>a</sup> |
|-----------------|-------------------|---------------------------------|
| 1               | 0                 | -0.09                           |
| 2               | 50                | 50.00                           |
| 3               | 100               | 100.10                          |
| 4               | 150               | 149.40                          |
| 5               | 200               | 200.20                          |
| 6               | 250               | 250.27                          |

<sup>a</sup> Mean value,  $n = 6$ .

cresolphthalein complexon sodium salt, swirl to dissolve. Dilute to volume with H<sub>2</sub>O, mix. Vacuum filter through 0.45  $\mu$ m porosity filter, add 1 mL wetting agent (a), mix.

(g) *AMP solution*.—Add 44.6 g 2-amino-2-methyl-1-propanol to about 800 mL H<sub>2</sub>O, dilute to 1 L, mix.

(h) *Calcium stock solution, 2.5 mg Ca/mL*.—Add 1.5608 g NIST CaCO<sub>3</sub> (assuming a NIST certified value of 40.0442% Ca, dried 2 h at 105°C before use) to 250 mL volumetric flask. Add about 65 mL water and 2.5 mL HCl to dissolve, dilute to volume with H<sub>2</sub>O, mix.

### Standards

In 6 digestion tubes, prepare reagent blanks as in 976.06(G), paragraphs 1 and 2, beginning "Add 9 g K<sub>2</sub>SO<sub>4</sub>, 0.42 g HgO, and 15 mL H<sub>2</sub>SO<sub>4</sub> . . .". When spraying tubes after digestion, be sure to allow for addition of appropriate amounts of stock standard(s). Transfer reagent blanks to 250 mL volumetric flasks and pipet 0, 5, 10, 15, 20, 25 mL of Ca stock solution to each. Standards will contain 0, 50, 100, 150, 200, and 250 mg Ca/L. Standards are stable for approximately 2 months.

### Determination

Prepare samples as in 976.06(G), paragraphs 1 and 2. Use the following parameters to analyze samples: 90 samples/h; 5 sample/wash ratio; no pecking; use base correction; quadratic standard curve fit; base not in calibration curve. Use protocol P,2N,6C,H,2L (10S,I) times  $m$ , H,2L,2N,G,4N,E, where  $m$  can be any number from 1–4.

Enter standard concentrations as mg Ca/L. Arrange standards in descending order, with gain peak referenced to the initial high standard. Null peaks should be zero concentration standard solution and internal standard peaks should be high standard solution. Exercise caution when using repeated

**Table 9. Determination of calcium in routine feed samples by official atomic absorption method and TRAACS method, using 2.5 mL HCl in calcium stock standard and revised protocol of low nulls<sup>a</sup>**

| Atomic absorption <sup>b</sup> | TRAACS <sup>b</sup> | Diff. <sup>b</sup> | Atomic absorption <sup>b</sup> | TRAACS <sup>b</sup> | Diff. <sup>b</sup> |
|--------------------------------|---------------------|--------------------|--------------------------------|---------------------|--------------------|
| 0.450                          | 0.506               | -0.056             | 6.870                          | 6.781               | 0.089              |
| 0.470                          | 0.523               | -0.053             | 6.950                          | 6.963               | -0.013             |
| 0.650                          | 0.710               | -0.060             | 7.110                          | 6.624               | 0.486              |
| 0.660                          | 0.680               | -0.020             | 7.240                          | 7.507               | -0.267             |
| 0.940                          | 1.009               | -0.069             | 7.310                          | 7.453               | -0.143             |
| 0.970                          | 1.098               | -0.128             | 7.800                          | 8.509               | -0.709             |
| 1.120                          | 1.080               | 0.040              | 8.630                          | 9.214               | -0.584             |
| 1.410                          | 1.347               | 0.063              | 8.660                          | 9.287               | -0.627             |
| 1.480                          | 1.461               | 0.019              | 10.170                         | 10.307              | -0.137             |
| 1.520                          | 1.344               | 0.176              | 10.300                         | 10.188              | 0.112              |
| 1.660                          | 1.781               | -0.121             | 10.310                         | 10.522              | -0.212             |
| 1.710                          | 1.878               | -0.168             | 10.380                         | 9.729               | 0.651              |
| 1.950                          | 2.005               | -0.055             | 11.430                         | 11.662              | -0.232             |
| 2.130                          | 2.032               | 0.098              | 11.850                         | 12.142              | -0.292             |
| 2.240                          | 2.229               | 0.011              | 11.850                         | 11.685              | 0.165              |
| 2.670                          | 2.608               | 0.062              | 12.020                         | 12.124              | -0.104             |
| 3.270                          | 3.419               | -0.149             | 12.640                         | 12.379              | 0.261              |
| 3.390                          | 3.566               | -0.176             | 12.700                         | 12.749              | -0.049             |
| 3.430                          | 3.395               | 0.035              | 12.880                         | 12.520              | 0.360              |
| 3.430                          | 3.554               | -0.124             | 13.800                         | 13.329              | 0.471              |
| 3.480                          | 3.402               | 0.078              | 13.900                         | 13.543              | 0.357              |
| 3.660                          | 3.701               | -0.041             | 15.590                         | 15.186              | 0.404              |
| 3.670                          | 3.665               | 0.005              | 16.020                         | 17.138              | -1.118             |
| 3.840                          | 3.902               | -0.062             | 16.850                         | 16.441              | 0.409              |
| 3.880                          | 4.004               | -0.124             | 16.940                         | 17.274              | -0.334             |
| 3.940                          | 3.858               | 0.082              | 17.200                         | 17.241              | -0.041             |
| 4.010                          | 4.277               | -0.267             | 17.330                         | 17.823              | -0.493             |
| 4.020                          | 4.027               | -0.007             | 18.210                         | 17.528              | 0.682              |
| 4.540                          | 4.377               | 0.163              | 18.320                         | 18.331              | -0.011             |
| 5.330                          | 5.352               | -0.022             | 18.910                         | 18.778              | 0.132              |
| 6.030                          | 5.982               | 0.048              | 22.400                         | 22.336              | 0.064              |
| 6.380                          | 6.691               | -0.311             | 23.900                         | 23.077              | 0.823              |
| 6.520                          | 6.384               | 0.136              | 24.320                         | 24.270              | 0.050              |
| 6.780                          | 6.889               | -0.109             |                                |                     |                    |

<sup>a</sup>  $t$ -Tests grouped by concn ranges revealed no significant difference at the  $P \leq 0.01$  level. 0–2% ( $n = 13$ ), 2–6% ( $n = 17$ ), 6–12% ( $n = 19$ ), 12–25% ( $n = 18$ ).

<sup>b</sup> Percent calcium.

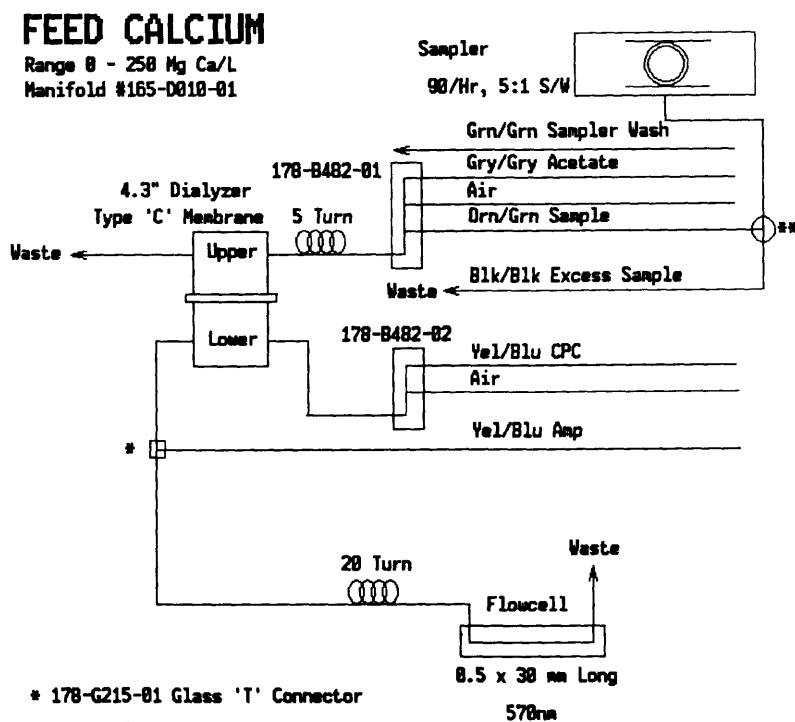

Figure 1. Flow diagram for calcium.

sampling from the same cup, other than for null peaks, because the probe will gradually contaminate the solution.

$$\% \text{ Calcium} = [\text{calculated sample conc (mg/L)} \times 0.025] / \text{mg SWT}$$

#### METHOD FOR PHOSPHORUS IN FEEDS

##### Principle

Samples are digested on a block digester with  $\text{H}_2\text{SO}_4$  and reacted with molybdovanadate in acidic medium. Absor-

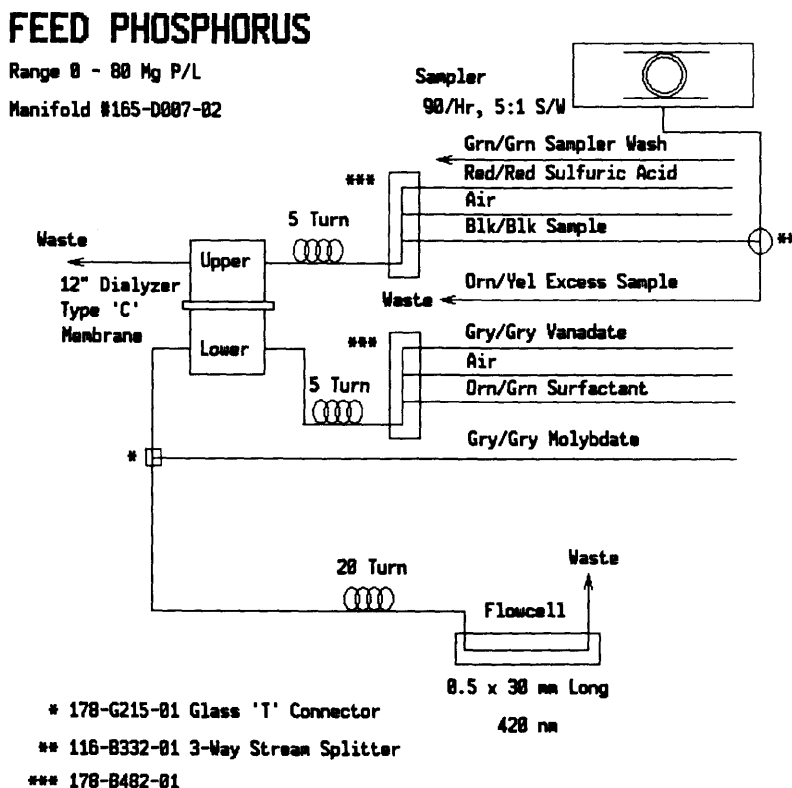

Figure 2. Flow diagram for phosphorus.

bance of phospho-molybdovanadate is measured in a flow cell at 420 nm.

### Apparatus

(a) *Block digester*.—Capable of maintaining a constant temperature of 410°C.

(b) *Continuous flow autoanalyzer*.—[Bran + Luebbe (Technicon) Analyzing Technologies, Inc. TRAACS 800] with phosphorus manifold 165-D007-02 (Figure 2).

### Reagents

(a) *Steol 40% w/w solution*.—To 40 g of Steol 650 concentrate (Brand-Nu Laboratories, Inc., Meriden, CT 06450), add 60 mL H<sub>2</sub>O slowly, dropwise, with stirring. Mix thoroughly.

(b) *System wash solution*.—Dilute 5 mL HCl to 1 L with H<sub>2</sub>O, add 1 mL Steol 40% solution (a), mix.

(c) *Molybdate solution*.—Dissolve 20 g ammonium molybdate in about 800 mL H<sub>2</sub>O, adjust pH to 7.0 with NH<sub>4</sub>OH (about 10 mL), dilute to 1 L, mix.

(d) *Vanadate solution*.—Add 30 mL H<sub>2</sub>SO<sub>4</sub> to about 700 mL H<sub>2</sub>O. Add 150 mg ammonium metavanadate and dissolve. Cool, dilute to 1 L, mix.

(e) *H<sub>2</sub>SO<sub>4</sub> solution*.—Add 60 mL H<sub>2</sub>SO<sub>4</sub> to about 800 mL H<sub>2</sub>O, cool, mix, dilute to 1 L, add 1 mL Steol 40% solution (a), mix.

(f) *Surfactant solution*.—Dilute 4 mL Steol 40% solution (a) to 1 L with H<sub>2</sub>O, mix.

(g) *Sampler wash solution, 6% H<sub>2</sub>SO<sub>4</sub>*.—Dissolve 60 mL H<sub>2</sub>SO<sub>4</sub> in 800 mL H<sub>2</sub>O, cool, dilute to 1 L, mix.

(h) *Phosphorus stock solutions, PI: 0.5 g P/mL and PII: 2.0 g P/mL*.—PI: Add 0.4398 g NIST KH<sub>2</sub>PO<sub>4</sub> (assuming a NIST certified value of 22.74% P: dried 2 h at 105°C before use) to 200 mL volumetric flask. Stir to dissolve and dilute to volume. PII: Add 0.8795 g NIST KH<sub>2</sub>PO<sub>4</sub> (assuming a NIST certified value of 22.74% P: dried 2 h at 105°C before use) to 100 mL volumetric flask. Stir to dissolve and dilute to volume.

### Standards

In 6 digestion tubes, prepare reagent blanks as in the first 2 paragraphs of 976.06(G), beginning "Add 9 g K<sub>2</sub>SO<sub>4</sub>, 0.42 g HgO, and 15 mL H<sub>2</sub>SO<sub>4</sub> . . .". When spraying tubes after digestion, be sure to allow for addition of appropriate amounts of stock standard(s). Transfer reagent blanks to 250 mL volumetric flasks and pipet 0, 15, 30, and 45 mL of PI stock solution (standards 1–4) and 15 and 40 mL of PII stock solution (standards 5 and 6). Standards will contain 0, 15, 30, 45, 60, and 80 mg P/L. Standards are stable for approximately 2 months.

### Determination

Prepare samples as in 976.06(G), paragraphs 1 and 2. Use the following parameters to analyze samples: 90 samples/h; 5 sample/wash ratio; no pecking; use base correction; quadratic standard curve fit; base not in calibration curve. Use protocol P,2N,6C,H,2L (10S,I) times *m*, H,2L,2N,G,4N,E, where *m* can be any number from 1–4.

Enter standard concentrations as mg P/L. Arrange standards in descending order, with gain peak referenced to the initial high standard. Null peaks should be zero concentration standard solution and internal standard peaks are to be high standard solution. Exercise caution when using repeated sampling from the same cup, other than for null peaks, because the probe will gradually contaminate the solution.

$$\% \text{ Phosphorus} = [\text{calculated sample conc (mg/L)} \times 0.025] / \text{mg SWT}$$

### REFERENCES

- (1) *Official Methods of Analysis* (1990) 15th Ed., AOAC, Arlington, VA, secs 962.02, 968.08, 976.06, 990.02
- (2) Hambleton, Larry G. (1977) *J. Assoc. Off. Anal. Chem.* **60**, 845–852
- (3) Kane, P., Orcutt, A., & Huber, J. (1989) *J. Assoc. Off. Anal. Chem.* **72**, 862–867
- (4) Kane, P. (Associate Referee), & Orcutt, A. (1990) *J. Assoc. Off. Anal. Chem.* **73**, 31–34
